# Supplementary material
Source: publisher figshare collection journal article supplement (https://gsapubs.figshare.com/ndownloader/files/34961823)
Supplement: Supplementary file 1 [file 34961823]

## Sheet: Tiepoints 2020-5-8.txt
U1338 depth (mcd)	U1338 age (ka)	U1337 depth (revised mcd)	U1337 age (ka)	1146A depth (revised mbsf )	1146 age (ka)	1236 depth (mcd)	1236 age (ka)	1237 depth (mcd)	1237 age (ka)	U1443 depth (mcd)	U1443 age (ka)	751A depth (mcd)	751A (age)
331.92	12724	336.66	14949	463.43	12724	78.41	12839	198.75	12518	136.95	12732	116.05	15076
332.72	12766	339.35	15080	466.25	12815	83.86	13541	201.22	12750	137.23	12849	124.15	15512
334.53	12817	339.96	15119	467.24	12857	84.77	13639	202.02	12814	138.01	13143	126.29	15640
335.84	12857	341.17	15194	468.44	12932	87.08	13816	202.27	12858	140.35	13545	127.97	16050
337.64	12932	341.97	15234	469.34	12970	87.91	13917	202.88	12934	144.44	13814	128.52	16092
338.85	12970	343.72	15325	469.95	13011	88.70	14036	203.22	12970	145.25	13906	133.56	16617
339.98	13010	345.91	15402	471.25	13051	92.65	14641	203.69	13009	146.68	14181	138.07	16932
341.78	13049	347.72	15286	472.55	13104	93.03	14736	204.29	13049	148.60	14625	142.96	17329
344.41	13102	348.52	15478	473.61	13143	94.76	15096	204.86	13101	150.87	15222	145.16	17726
345.71	13141	351.74	15610	475.28	13218	95.30	15218	205.70	13142	152.32	15610	147.26	17984
347.68	13217	353.54	15685	475.96	13252	95.62	15311	206.42	13218	153.46	15969	148.43	18081
348.88	13256	354.13	15724	476.41	13270	98.04	15966	206.83	13252	154.15	16103
351.77	13332	356.02	15800	477.52	13332	99.03	16010	208.18	13372	154.71	16334
353.07	13371	357.64	15894	478.21	13370	101.08	16638	208.97	13425	154.87	16454
355.29	13425	359.32	15968	478.89	13414			210.12	13500	155.28	16626
358.29	13501	362.67	16175	479.68	13432			210.42	13542	156.15	16929
359.59	13541	365.77	16341	482.01	13544			211.67	13634	157.36	17330
361.54	13594	370.86	16697	483.55	13587			212.76	13702
362.57	13635	373.43	16812	485.04	13635			215.22	13827
365.07	13708	376.62	17017	487.15	13698			215.62	13874
367.83	13761	378.52	17095	487.80	13714			216.02	13920
371.83	13843	382.46	17301	489.86	13761			216.22	13949
372.79	13888	389.25	17585	489.95	13834			216.47	13993
373.04	13901	390.65	17660	490.22	13844			216.77	14025
375.54	13992	391.05	17700	490.76	13886			217.88	14143
377.09	14031	393.68	17944	491.15	13900			219.35	14278
379.28	14108	394.85	17984	492.16	13949			219.71	14364
383.60	14275			492.98	13993			220.86	14547
384.65	14304			494.20	14025			221.20	14635
386.90	14390			495.05	14071			221.93	14733
388.10	14436			496.55	14111			222.48	14836
391.18	14506			511.78	14777			222.87	14934
392.83	14550			513.67	14832			223.77	15098
394.38	14589			517.15	14925			224.35	15222
399.78	14777			521.32	15068			225.05	15305
401.30	14835			524.86	15194			225.80	15475
404.69	14910			532.59	15442			226.21	15519
405.69	14949			534.10	15517			226.77	15571
409.10	15080			536.53	15568			226.87	15591
410.10	15119			538.21	15607			227.12	15612
412.37	15194			543.36	15914			227.48	15662
413.07	15234			547.69	16161			228.06	15766
413.97	15286			550.69	16282			228.22	15801
414.87	15325			558.70	16619			229.28	15920
419.07	15440			559.90	16725			229.94	16023
420.96	15518			562.50	16937			230.79	16163
423.94	15570			565.48	17076			232.87	16624
424.74	15610			568.37	17330			233.27	16729
426.96	15685							234.05	16927
427.87	15724							235.51	17300
429.11	15764
430.22	15800
431.64	15855
432.56	15894
435.50	15968

## Sheet: Table S3 info
This Supplemental Material accompanies
Holbourn, A., Kuhnt, W., Kochhann, K.G.D., Matsuzaki, K.M., and Andersen, N., 2022, Middle Miocene climate–carbon cycle dynamics:
Keys for understanding future trends on a warmer Earth?, in Aiello, I., Barron, J., and Ravelo, C., eds., Understanding the Monterey
Formation and Similar Biosiliceous Units across Space and Time: Geological Society of America Special Paper 556, https://doi.org/10.1130/2022.2556(05).
Supplemental Table S3: Tie points used for correlation of 13C records from Sites 751, 1146, 1236, 1237 and U1443 to composite record from U1337-U1338.
For Site 1171, we used the revised age model from Holbourn et al. (2007).
